# Supplementary material for: RNANet: an automatically built dual-source dataset integrating homologous sequences and RNA structures
Source: Oxford University Press journal article supplement (doi:10.1093/bioinformatics/btaa944), 2020-10-27
Supplement: btaa944_supplementary_data.pdf [file btaa944_supplementary_data.pdf]

# 1 Description of the RNA<sub>Net</sub> database

Table 1 lists all the per-nucleotide (per-position) descriptors available in the database. Figure 1 shows the associated SQL schema.

| Descriptor                                                                                                                                                                  | Label                                      | Type             |
|-----------------------------------------------------------------------------------------------------------------------------------------------------------------------------|--------------------------------------------|------------------|
| Index of the residue in the chain (from 1 to N)                                                                                                                             | index_chain                                | int $\geq$ 1     |
| Index of the residue in the source mmCIF file                                                                                                                               | nt_resnum                                  | int $\geq$ 1     |
| Position of the nucleotide in the chain, normalized by its length (value between 0 and 1)                                                                                   | nt_position                                | float            |
| Nucleotide name, including modified bases (like 5MC)                                                                                                                        | nt_name                                    | str              |
| One-letter name. Lowercase "acgtu" letters are used for modified "ACGTU" bases                                                                                              | nt_code                                    | char             |
| Letter used for sequence alignment (*)                                                                                                                                      | nt_align_code                              | char             |
| One-hot encoded sequence. 'other' contains gaps, unknown and modified nucleotides                                                                                           | is_A, is_C, is_G, is_U, is_other           | 0 or 1           |
| Nucleotide frequencies (PSSM) at the current position in this RNA family                                                                                                    | freq_A, freq_C, freq_G, freq_U, freq_other | float            |
| Secondary structure in dot-bracket notation of this position                                                                                                                | dbn                                        | char             |
| Zero, or comma-separated values of index_chain of the nucleotide(s) which is(are) paired with this one. Canonical (Watson-Crick or Wobble) basepairs are first in the list. | paired                                     | int, int, ...    |
| Number of other bases interacting with the nucleotide                                                                                                                       | nb_interact                                | int $\geq$ 0     |
| Type of basepair in Leontis-Westhof nomenclature (comma-separated list)                                                                                                     | pair_type_LW                               | str, str, ...    |
| Type of basepair in DSSR nomenclature (comma-separated list)                                                                                                                | pair_type_DSSR                             | str, str, ...    |
| The six torsion angles of the backbone, from 5' to 3', between 0 and $2\pi$                                                                                                 | alpha, beta, gamma, delta, epsilon, zeta   | float (rad)      |
| Difference between epsilon and zeta torsion angles                                                                                                                          | epsilon_zeta                               | float (rad)      |
| Conformation of the backbone                                                                                                                                                | bb_type                                    | BI, BII, or '..' |
| $\chi$ torsion angle (between ribose and base)                                                                                                                              | chi                                        | float (rad)      |
| Conformation of the sugar with respect to the base (depends on $\chi$ )                                                                                                     | glyco_bond                                 | syn or anti      |
| Torsion angles of the ribose cycle                                                                                                                                          | $\nu_0, \nu_1, \nu_2, \nu_3, \nu_4$        | float (rad)      |
| If the nucleotide is involved in a stem, the stem type                                                                                                                      | form                                       | A, B, Z or '..'  |
| Z-coordinate of the 3' phosphorus atom with reference to the 5' base plane                                                                                                  | ssZp                                       | float            |
| Perpendicular distance of the 3' P atom to the glycosidic bond                                                                                                              | Dp                                         | float            |
| Pseudotorsions between P and $C'_1$                                                                                                                                         | eta, theta                                 | float (rad)      |
| Pseudotorsions between P and $C'_4$                                                                                                                                         | eta_prime, theta_prime                     | float (rad)      |
| Pseudotorsions between P and the base center                                                                                                                                | eta_base, theta_base                       | float (rad)      |
| Conformation of the ribose cycle                                                                                                                                            | phase_angle                                | float (rad)      |
| Amplitude of the sugar puckering                                                                                                                                            | amplitude                                  | float            |
| Conformation of the ribose cycle (10 classes corresponding to specific ranges of phase)                                                                                     | puckering                                  | str              |

Table 1: Descriptors of the data points (RNA chains), concerning their sequence (top group of the table), secondary structure (second group) and 3D structure (bottom group). The bottom group directly comes from annotation of the available 3D structure by DSSR. Base-pairs and their types are also the ones detected by DSSR, but the numbering of the base partners has been modified to fit our own `index_chain` numbering instead of the structure residue numbers. The homology data (frequencies) are computed on the multiple sequence alignments. When a value is missing, it is set to 'NaN'. (\*) The `nt_align_code` field is set twice: first when annotating the 3D structure with DSSR, and then after the re-mapping step when gaps are replaced by the most frequent base at this position.

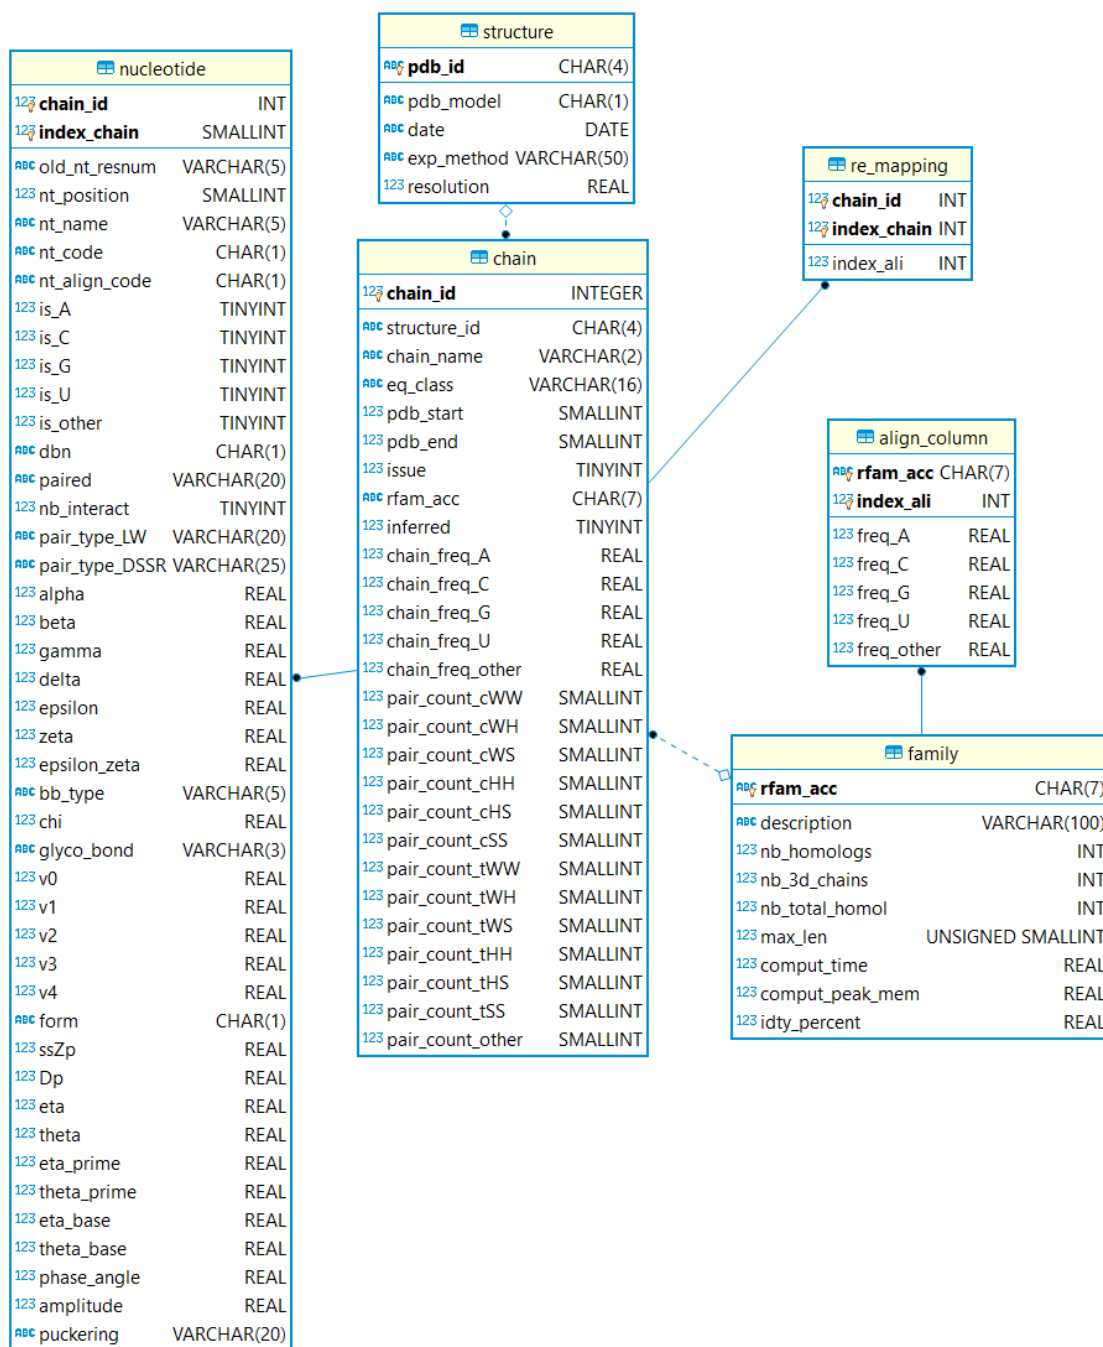

Figure 1: Database schema with table names and their respective data fields.

## 2 Rfam families used

Below in Table 2 are the content of the "family" table of the database. You can reproduce this with the following SQL query:

```
SELECT rfam_acc, nb_homologs, nb_3d_chains, nb_total_homol, max_len, idty_percent, description
FROM family ORDER BY nb_3d_chains DESC;
```

Table 2: Number of RNA sequences mapped to Rfam families. This data results from the Rfam-PDB mappings, extended to RNA equivalence classes as given by the BGSU redundancy list. For ribosomal RNAs, the number of sequence hits reported is the number of sequences included in their ARB database files: 2 225 272 for SSUs (ARB file release 138) and 198 843 for LSUs (ARB file release 132).

| Rfam accession | Nb seq. hits (Rfam & Silva) | Nb 3D chains (from PDB) | Total   | Maximum seq. length | % identity | Description                                     |
|----------------|-----------------------------|-------------------------|---------|---------------------|------------|-------------------------------------------------|
| RF00005        | 1429931                     | 1694                    | 1431625 | 294                 | 0.56       | tRNA                                            |
| RF00001        | 140644                      | 1121                    | 141765  | 346                 | 0.69       | 5S ribosomal RNA                                |
| RF00177        | 2225272                     | 976                     | 2226248 | 3532                | 0.71       | Bacterial small subunit ribosomal RNA           |
| RF02541        | 198843                      | 880                     | 199723  | 8886                | 0.79       | Bacterial large subunit ribosomal RNA           |
| RF01960        | 2225272                     | 317                     | 2225589 | 5326                | 0.76       | Eukaryotic small subunit ribosomal RNA          |
| RF02543        | 198843                      | 315                     | 199158  | 11047               | 0.59       | Eukaryotic large subunit ribosomal RNA          |
| RF00002        | 198843                      | 295                     | 199138  | 290                 | 0.68       | 5 8S ribosomal RNA                              |
| RF01852        | 2359                        | 98                      | 2457    | 113                 | 0.43       | Selenocysteine transfer RNA                     |
| RF02540        | 198843                      | 72                      | 198915  | 9020                | 0.96       | Archaeal large subunit ribosomal RNA            |
| RF00167        | 2631                        | 54                      | 2685    | 157                 | 0.65       | Purine riboswitch                               |
| RF01846        | 643                         | 46                      | 689     | 538                 | 0.27       | Fungal small nucleolar RNA U3                   |
| RF00026        | 47589                       | 45                      | 47634   | 432                 | 0.63       | U6 spliceosomal RNA                             |
| RF00234        | 935                         | 42                      | 977     | 381                 | 0.79       | glmS glucosamine phosphate activated ribozyme   |
| RF00020        | 7673                        | 39                      | 7712    | 189                 | 0.59       | U5 spliceosomal RNA                             |
| RF00004        | 16770                       | 34                      | 16804   | 343                 | 0.57       | U2 spliceosomal RNA                             |
| RF00162        | 6026                        | 30                      | 6056    | 376                 | 0.9        | SAM riboswitch box leader                       |
| RF02001        | 3545                        | 30                      | 3575    | 341                 | 0.93       | Group II catalytic intron D1 D4 3               |
| RF00028        | 2611                        | 28                      | 2639    | 893                 | 0.7        | Group catalytic intron                          |
| RF01998        | 2271                        | 26                      | 2297    | 152                 | 0.76       | Group II catalytic intron D1 D4 1               |
| RF00059        | 12558                       | 24                      | 12582   | 256                 | 0.79       | TPP riboswitch THI element                      |
| RF00382        | 79                          | 22                      | 101     | 68                  | 0.74       | DnaX ribosomal frameshifting element            |
| RF00504        | 4591                        | 19                      | 4610    | 250                 | 0.93       | Glycine riboswitch                              |
| RF00169        | 5208                        | 17                      | 5225    | 122                 | 0.69       | Bacterial small signal recognition particle RNA |
| RF01051        | 4682                        | 17                      | 4699    | 271                 | 0.79       | Cyclic di GMP riboswitch                        |
| RF00023        | 6693                        | 16                      | 6709    | 785                 | 0.72       | transfer messenger RNA                          |
| RF00168        | 2239                        | 16                      | 2255    | 335                 | 0.96       | Lysine riboswitch                               |
| RF00379        | 3855                        | 16                      | 3871    | 325                 | 0.77       | ydaO yuaA leader                                |
| RF01510        | 15                          | 16                      | 31      | 64                  | 0.87       | M florum riboswitch                             |
| RF00017        | 42477                       | 15                      | 42492   | 807                 | 0.35       | Metazoan signal recognition particle RNA        |
| RF01763        | 647                         | 13                      | 660     | 83                  | 0.98       | Guanidine III riboswitch                        |
| RF00008        | 3180                        | 12                      | 3192    | 133                 | 0.71       | Hammerhead ribozyme type III                    |
| RF00015        | 7692                        | 12                      | 7704    | 311                 | 0.65       | U4 spliceosomal RNA                             |
| RF00032        | 30493                       | 12                      | 30505   | 89                  | 0.77       | Histone UTR stem loop                           |
| RF01344        | 379                         | 12                      | 391     | 36                  | 0.99       | CRISPR RNA direct repeat element                |
| RF01831        | 637                         | 12                      | 649     | 250                 | 0.82       | THF riboswitch                                  |
| RF01959        | 2225272                     | 12                      | 2225284 | 3682                | 0.23       | Archaeal small subunit ribosomal RNA            |
| RF00458        | 16                          | 11                      | 27      | 216                 | 0.63       | Cripavirus internal ribosome entry site IRES    |
| RF00044        | 5                           | 10                      | 15      | 244                 | 0.96       | Bacteriophage pRNA                              |

| Rfam accession | Nb seq. hits (Rfam or Silva) | Nb 3D chains (PDB) | Total   | Maximum seq. length | % identity | Description                                       |
|----------------|------------------------------|--------------------|---------|---------------------|------------|---------------------------------------------------|
| RF00080        | 815                          | 10                 | 825     | 242                 | 0.95       | yybP ykoY manganese riboswitch                    |
| RF02679        | 72                           | 10                 | 82      | 80                  | 0.98       | Pistol ribozyme                                   |
| RF00050        | 4079                         | 8                  | 4087    | 348                 | 0.98       | FMN riboswitch RFN element                        |
| RF01750        | 1625                         | 8                  | 1633    | 204                 | 0.75       | ZMP ZTP riboswitch                                |
| RF00029        | 15721                        | 7                  | 15728   | 342                 | 0.59       | Group II catalytic intron                         |
| RF00061        | 80                           | 7                  | 87      | 262                 | 0.77       | Hepatitis virus internal ribosome entry site      |
| RF02545        | 2225272                      | 7                  | 2225279 | 629                 | 0.23       | Trypanosomatid mitochondrial SSU rRNA             |
| RF00010        | 6481                         | 6                  | 6487    | 813                 | 0.85       | Bacterial RNase class A                           |
| RF00100        | 15277                        | 6                  | 15283   | 637                 | 0.47       | 7SK RNA                                           |
| RF00488        | 40                           | 6                  | 46      | 825                 | 0.95       | Yeast U1 spliceosomal RNA                         |
| RF02796        | 13                           | 6                  | 19      | 71                  | 1.0        | Pab160 RNA                                        |
| RF00375        | 147                          | 5                  | 152     | 120                 | 0.4        | HIV primer binding site PBS                       |
| RF01734        | 2017                         | 5                  | 2022    | 160                 | 1.0        | Fluoride riboswitch                               |
| RF02012        | 1048                         | 5                  | 1053    | 192                 | 0.57       | Group II catalytic intron D1 D4 7                 |
| RF00009        | 1353                         | 4                  | 1357    | 1030                | 0.52       | Nuclear RNase P                                   |
| RF00011        | 790                          | 4                  | 794     | 437                 | 0.42       | Bacterial RNase class B                           |
| RF00037        | 1877                         | 4                  | 1881    | 57                  | 1.0        | Iron response element I                           |
| RF00373        | 373                          | 4                  | 377     | 635                 | 1.0        | Archaeal RNase P                                  |
| RF00634        | 1244                         | 4                  | 1248    | 171                 | 1.0        | S adenosyl methionine SAM riboswitch              |
| RF01689        | 211                          | 4                  | 215     | 216                 | 0.9        | AdoCbl variant RNA                                |
| RF01739        | 1102                         | 4                  | 1106    | 274                 | 1.0        | Glutamine riboswitch                              |
| RF01854        | 1143                         | 4                  | 1147    | 303                 | 0.94       | Bacterial large signal recognition particle RNA   |
| RF00233        | 49                           | 3                  | 52      | 88                  | 0.91       | Tymovirus Pomovirus Furovirus tRNA like UTR       |
| RF00254        | 522                          | 3                  | 525     | 90                  | 0.8        | mir 16 microRNA precursor family                  |
| RF00380        | 1058                         | 3                  | 1061    | 283                 | 1.0        | ykoK leader                                       |
| RF02348        | 77                           | 3                  | 80      | 106                 | 1.0        | Trans activating crRNA                            |
| RF00027        | 1503                         | 2                  | 1505    | 97                  | 0.8        | let microRNA precursor                            |
| RF00174        | 14211                        | 2                  | 14213   | 477                 | 0.58       | Cobalamin riboswitch                              |
| RF00228        | 23                           | 2                  | 25      | 575                 | 1.0        | Hepatitis virus internal ribosome entry site IRES |
| RF00390        | 7                            | 2                  | 9       | 23                  | 1.0        | UPSK RNA                                          |
| RF01704        | 670                          | 2                  | 672     | 95                  | 1.0        | Downstream peptide RNA                            |
| RF01725        | 792                          | 2                  | 794     | 159                 | 0.96       | SAM IV variant riboswitch                         |
| RF01786        | 629                          | 2                  | 631     | 106                 | 1.0        | Cyclic di GMP II riboswitch                       |
| RF02546        | 198843                       | 2                  | 198845  | 573                 | 0.92       | Trypanosomatid mitochondrial LSU rRNA             |
| RF00003        | 15536                        | 1                  | 15537   | 306                 |            | U1 spliceosomal RNA                               |
| RF00013        | 3655                         | 1                  | 3656    | 255                 |            | 6S SsrS RNA                                       |
| RF00025        | 25                           | 1                  | 26      | 212                 |            | Ciliate telomerase RNA                            |
| RF00066        | 2972                         | 1                  | 2973    | 104                 |            | U7 small nuclear RNA                              |
| RF00102        | 130                          | 1                  | 131     | 175                 |            | VA RNA                                            |
| RF00164        | 104                          | 1                  | 105     | 43                  |            | Coronavirus stem loop II like motif s2m           |
| RF00209        | 26                           | 1                  | 27      | 281                 |            | Pestivirus internal ribosome entry site IRES      |
| RF00250        | 72                           | 1                  | 73      | 61                  |            | Trans activation response element TAR             |
| RF00442        | 856                          | 1                  | 857     | 227                 |            | Guanidine riboswitch                              |
| RF00505        | 21                           | 1                  | 22      | 66                  |            | RydC RNA                                          |
| RF01807        | 12                           | 1                  | 13      | 219                 |            | GIR1 branching ribozyme                           |
| RF01826        | 18                           | 1                  | 19      | 94                  |            | SAM riboswitch                                    |
| RF01857        | 344                          | 1                  | 345     | 344                 |            | Archaeal signal recognition particle RNA          |
| RF02253        | 1199                         | 1                  | 1200    | 64                  |            | Iron response element II                          |
| RF02359        | 6                            | 1                  | 7       | 36                  |            | Bacteriophage MS2 operator hairpin                |
| RF02519        | 6                            | 1                  | 7       | 34                  |            | ToxI antitoxin                                    |
| RF02542        | 2225272                      | 1                  | 2225273 | 3056                |            | Microsporidia small subunit ribosomal RNA         |
| RF02553        | 192                          | 1                  | 193     | 189                 |            | Y RNA like                                        |
| RF02680        | 34                           | 1                  | 35      | 104                 |            | PreQ1 III riboswitch                              |
| RF02683        | 234                          | 1                  | 235     | 188                 |            | NiCo riboswitch                                   |

### 3 Additional results

Figure 2 presents the number of Rfam families used considering structures of increasing resolutions for both found experimental methods.

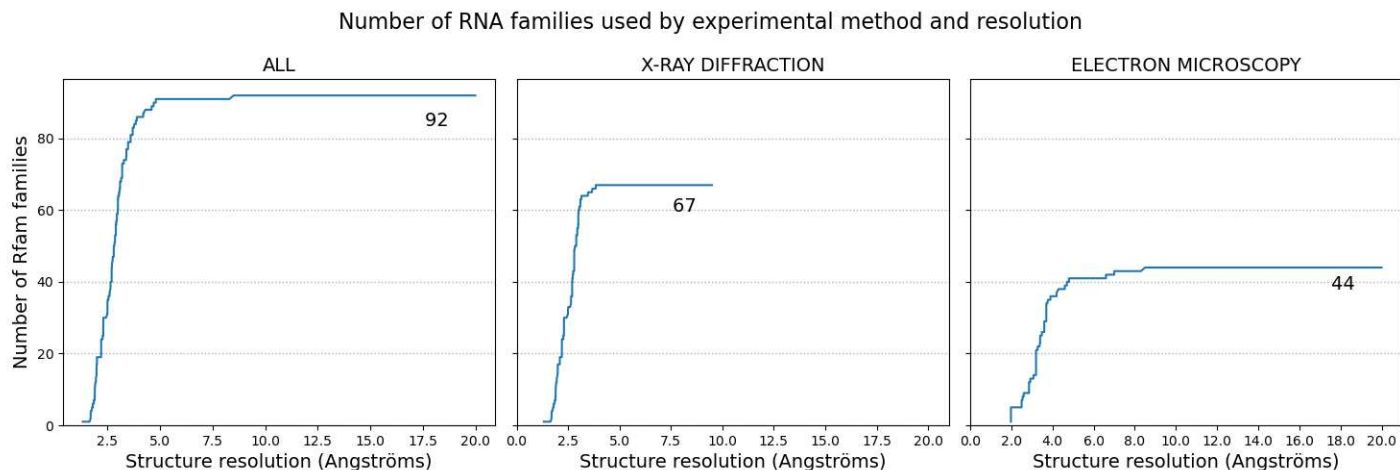

Figure 2: Number of Rfam families that have at least a representative 3D structure in our dataset when we accept structures of larger and larger resolutions. For X-ray diffraction, the curve stops early because there is no X-ray structure with resolution higher than 10.0 Angströms.

Figure 3 shows the number of solved chains in our dataset as a function of structure resolution and experimental method.

- **First column:** All the chains referenced in the BGSU non-redundant list are considered, even if they are not mapped to a Rfam family. As the BGSU list does not contain NMR structures, the RNANet database does not either. The distribution and the cumulative distribution are represented.
- **Second column:** Here we only consider chains with at least one mapping to a Rfam family. The distribution and the cumulative distribution are represented, plus a third curve, showing the fraction of the cumulative distribution composed by chains that are mapped only by inference using the BGSU lists. For example, chain 4BTC-A is not present in the Rfam-PDB mappings provided by Rfam. But, as it is part of the BGSU equivalence class NR\_4.0\_35542.70, whose members are known to be part of family RF00177 (the bacterial SSU rRNA), we can infer that 4BTC-A can be mapped to RF00177. The third curve shows the data gain in RNANet compared to the use of Rfam mappings only.
- **Third column:** Here we consider all the registered mapped chains, including multiple copies when a chain can be mapped to several families by inference. Inference is used only when no Rfam mapping is available. The distribution, cumulative distribution, and portion of the cumulative distribution obtained by inference only (and containing chain copies, if any) are represented.

Number of RNA chains by experimental method and resolution

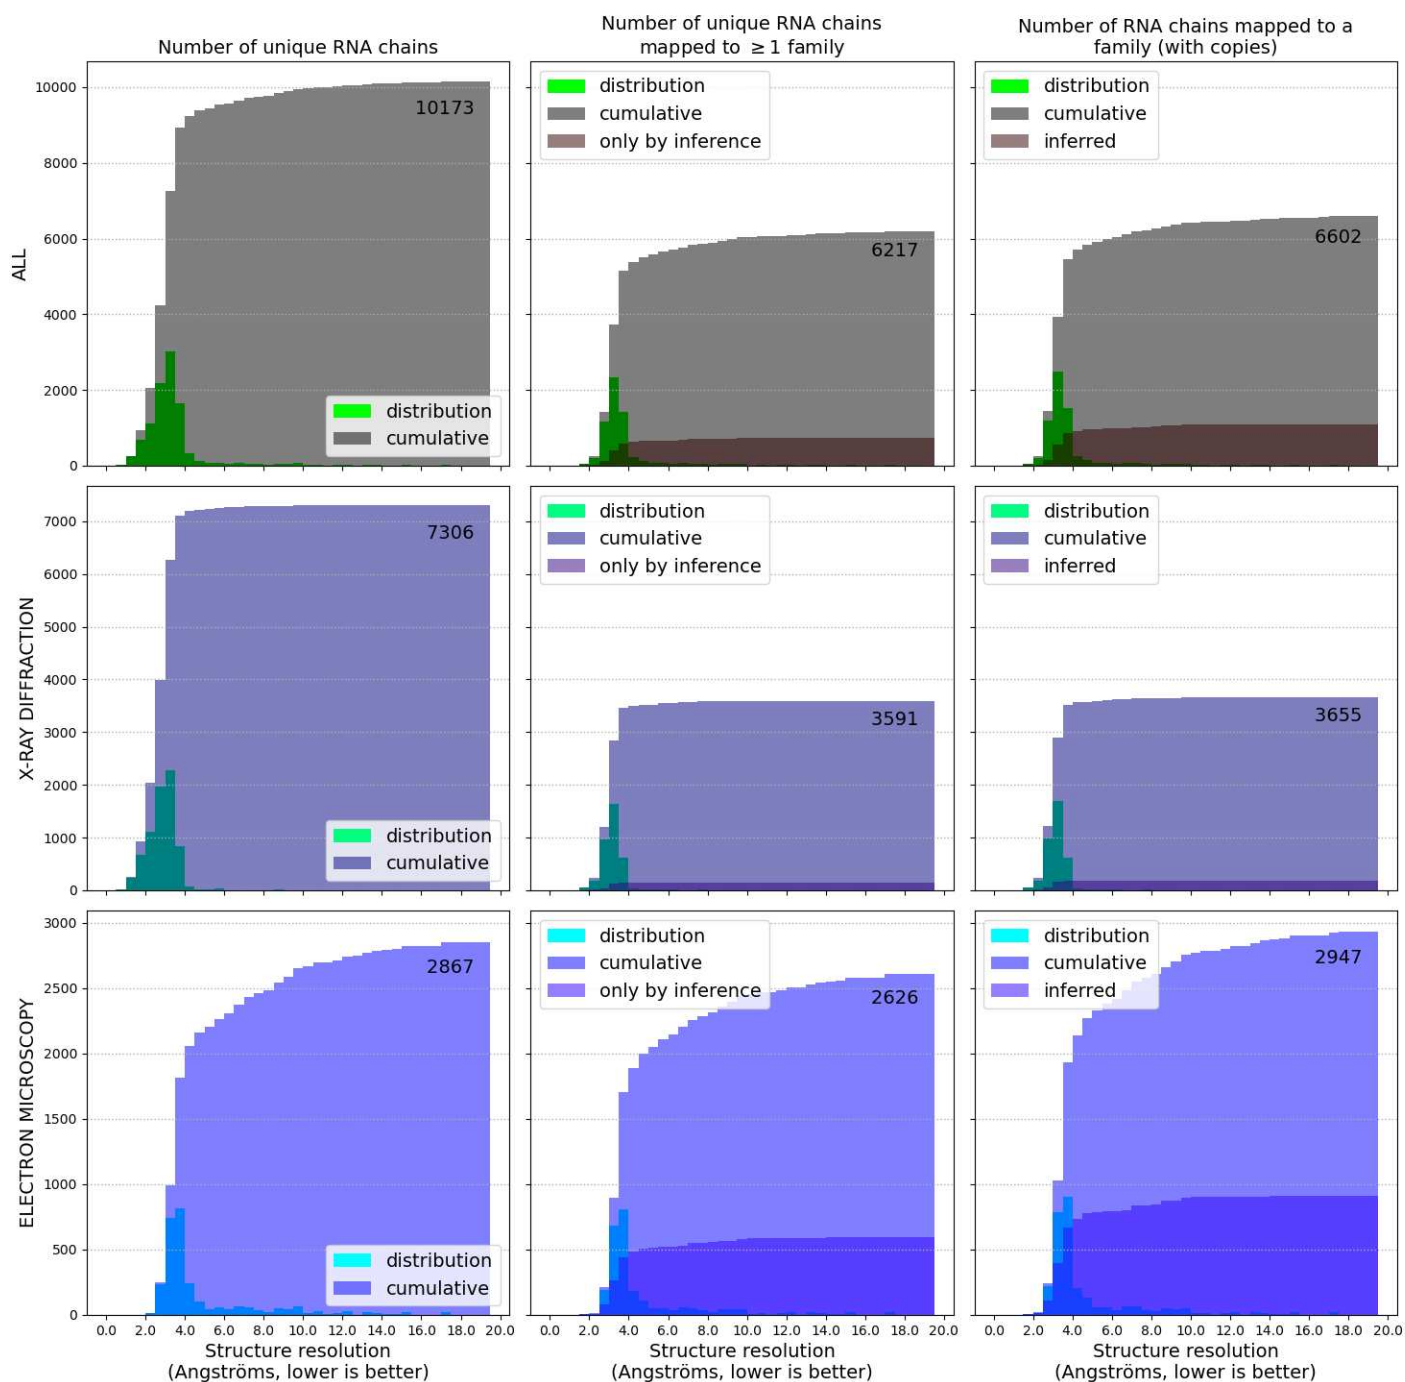

Figure 3: Distribution of the number of structures as a function of the initial PDB structure resolution. The top line summarizes all experimental methods merged, while the two following lines show the same plots, but only with chains solved by X-ray crystallography or electron microscopy, respectively.

Figure 4 presents statistics about base-base interactions, focusing on the Leontis-Westhof interaction type, and the two nucleotides sequence of the basepair. It shows that cis-Watson-Watson interactions are hugely more common than the other types, including of course the nucleotides from the stems. We can see that the majority of them are the so-called 'canonical' interactions cWW-AU, cWW-GU and cWW-GU (also called Wooble GU).

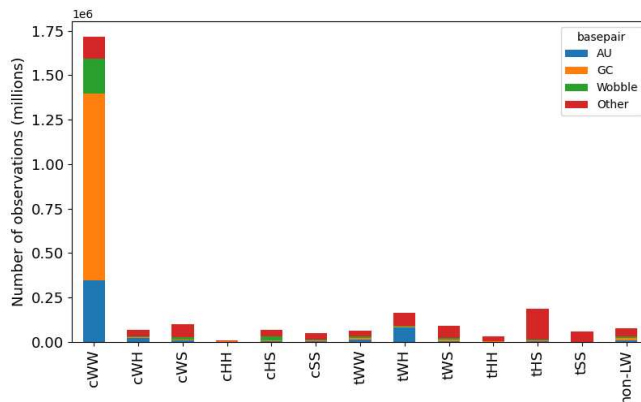

Figure 4: Count of the twelve Leontis-Westhof base pairing types in the dataset. Non-LW represents the base pairings that do not fit the nomenclature. Interactions labelled cWW include the so-called canonical Watson-Crick ( $G \equiv C$ ,  $A = U$ ) and wobble base-pairs ( $G = U$ ), represented in different colours.

## 4 Use case: reproduction of Wadley & al (2007) results

A data mining application of the RNANet dataset could be to reproduce, with the most recent data, the pseudotorsions joint distributions in a Ramachandran-like plot.

Wadley *et al.* proposed a first set of clusters observed in high-resolution structures available in 2007, separating nucleotides with riboses in C'2-endo or C'3-endo configurations. As a reminder, we extract their article's Figure 6 here in Figure 5. The left plot shows clusters concerning C3'-endo, non-helical nucleotides. The right plot shows clusters concerning C2'-endo nucleotides. Our Figure 6 reproduces their method with datasets of increasing resolution thresholds the scatter plots are superposed to Gaussian-kernel density estimates, the lowest level considered to delimit a cluster boundary being the average density of the plot plus one standard deviation. The more internal delimitations correspond to two and four standard deviations above the average density. The first lines A1 and A2 are expected to propose similar clusters compared to Figure 5 left and right plots, respectively. The first column corresponds to unique RNA chains with resolution 2.0Å or better (less than 2.0), similar to Wadley's set. The scatter plot looks similar to Wadley's figure, but several clusters are now considered not significant using their own methodology, falling under the threshold of one standard deviation. Increasing the dataset size to unique RNA chains with resolutions up to 3.0 and 4.0 Å, the clusters appear again for 2'-endo nucleotides, but not for 3'-endo non-helical nucleotides. The two last lines B1 and B2 use the  $\eta'/\theta'$  pseudobond system instead of  $\eta/\theta$ .

The right column (using structures with resolution  $\leq 4.0$  Å) corresponds to the main paper's Figure 5.

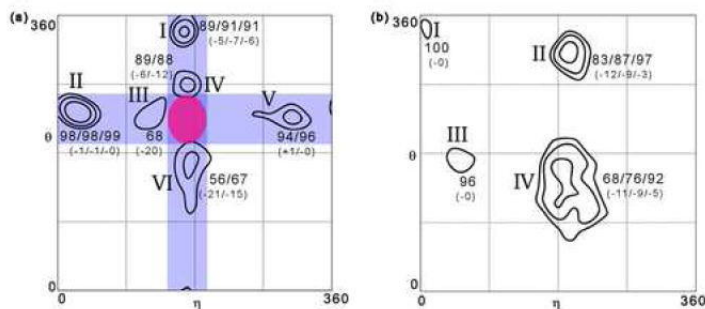

Figure 5: Figure 6 from Wadley LM, Keating KS, Duarte CM, Pyle AM. Evaluating and learning from RNA pseudotorsional space: quantitative validation of a reduced representation for RNA structure. *J Mol Biol.* 2007 Sep 28;372(4):942-957. Publicly available at Pubmed: <https://pubmed.ncbi.nlm.nih.gov/17707400/>

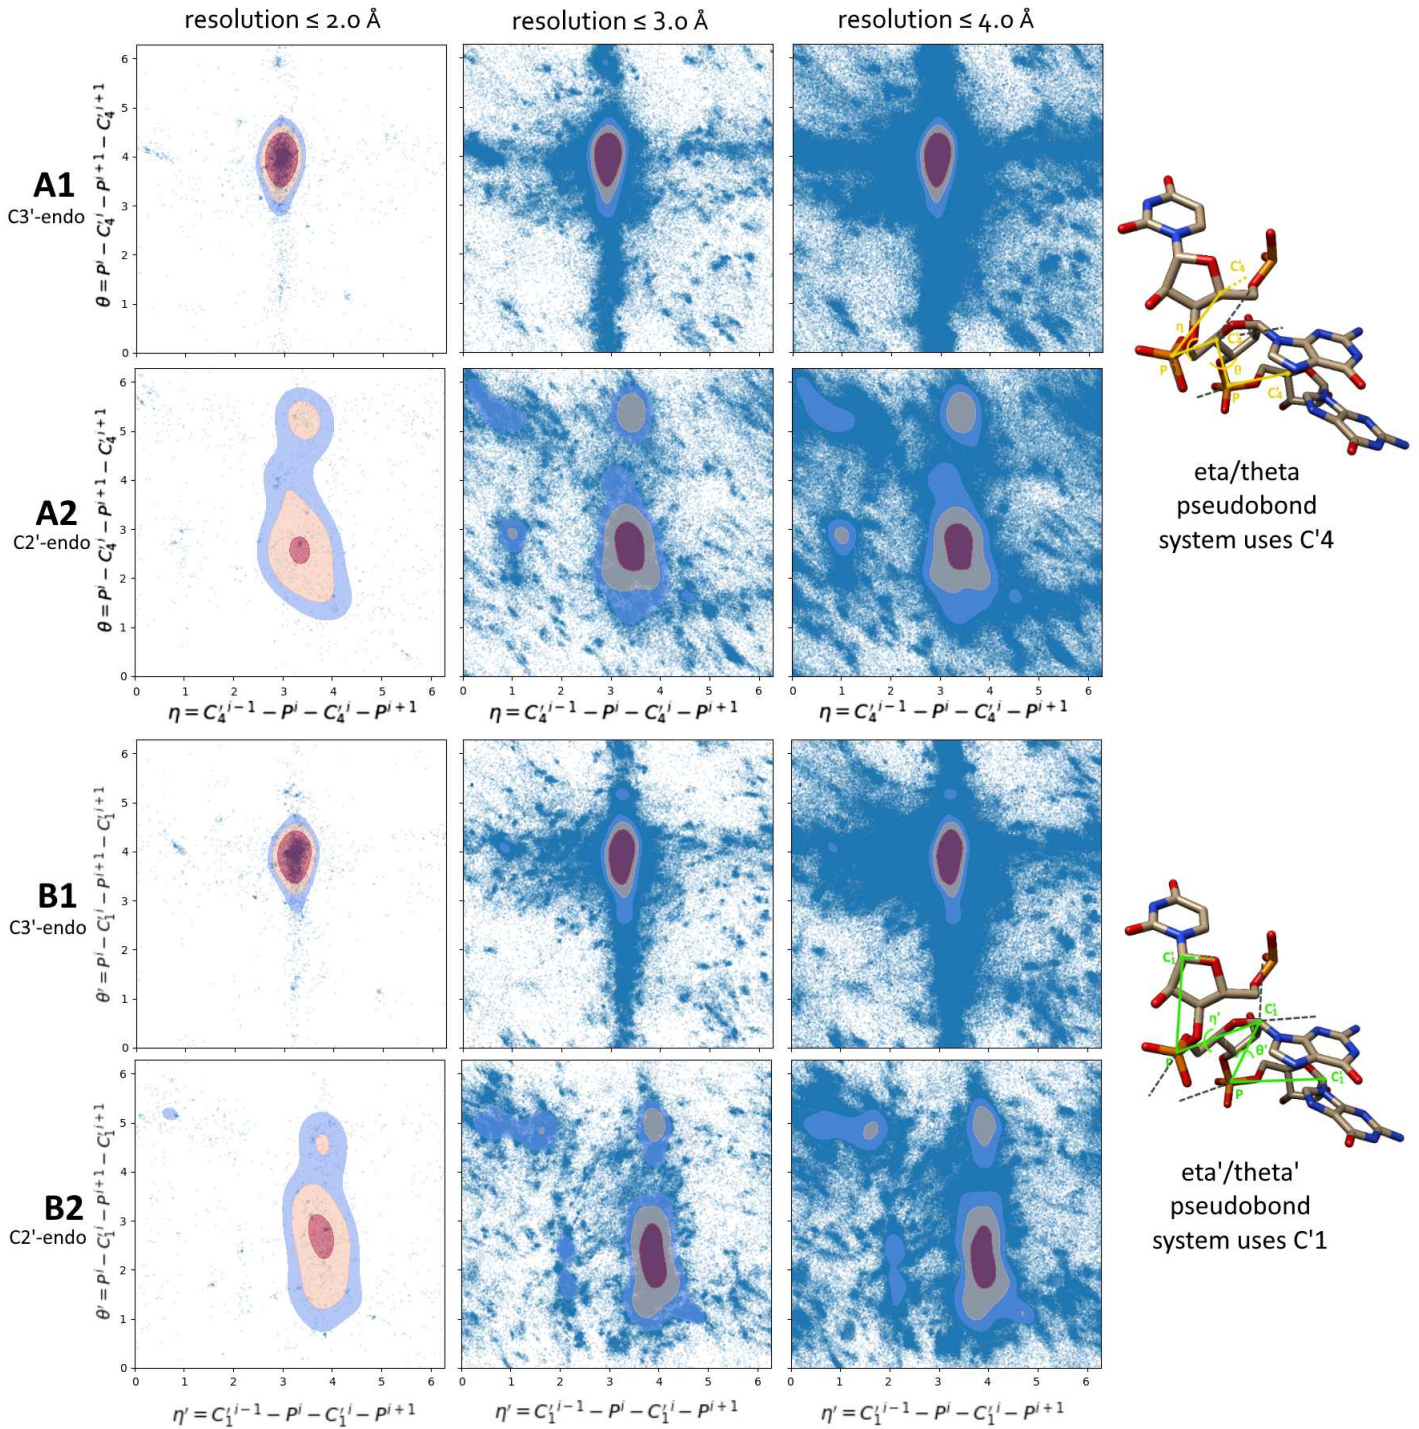

Figure 6: Ramachandran-like plots of the couples of pseudotorsions  $(\eta, \theta)$  in A1 (non-helical C3'-endo nucleotides) and A2 (C2'-endo nucleotides), and  $(\eta', \theta')$  in B1 (non-helical C3'-endo nucleotides) and B2 (C2'-endo nucleotides). Gaussian kernel density estimates are superposed to scatter plots. The line contours correspond to  $\rho + \sigma$ ,  $\rho + 2\sigma$  and  $\rho + 4\sigma$  where  $\rho$  is the average height of the kernel and  $\sigma$  its standard deviation. Columns correspond to three different datasets of unique RNA chains of increasing resolutions. Including more structures comes at the cost of decreasing precision in the pseudotorsion values, because of the approximative atom positions in lower resolution structures.
